# Supplementary material
Source: publisher figshare collection journal article supplement (https://sage.figshare.com/ndownloader/files/22077858)
Supplement: Supplementary file 1 [file 22077858]

**APPENDICES**

APPENDIX A. Fit Statistics for Unconditional Growth Model of Distress. Panel Study of Income Dynamics (2007-2017) and Childhood Retrospective Circumstances Study (2014) (N=3,240).

|  | Intercept Only | Intercept and Linear Slope | Intercept, Linear, Quadratic Slope (fixed quadratic variance at 0) |
| --- | --- | --- | --- |
| BIC | 38185.164 | 38005.699 | 46780.595 |
| Log-Likelihood | -19060.249 | -18958.391 | -23341.797 |

APPENDIX B. Fit Statistics for Unconditional Growth Model of Distress. Panel Study of Income Dynamics (2007-2017) and Childhood Retrospective Circumstances Study (2014). Non-Biological Parents Only (N=57).

|  | Intercept Only | Intercept and Linear Slope |
| --- | --- | --- |
| BIC | 665.557 | 675.470 |
| Log-Likelihood | -316.606 | -315.498 |

APPENDIX C. Intercept-Only Model Predicting K-6 Psychological Distress by Any Parental Mental Health Problems. Panel Study of Income Dynamics (2007-2017) and Childhood Retrospective Circumstances Study (2014). Non-Biological Parents Only (N=57)

|  | Model 1 | | Model 2 | |
| --- | --- | --- | --- | --- |
| Variable | Beta | SE | Beta | SE |
| Intercept | 1.214 | 0.146 *** | 1.380 | 0.288 *** |
|  |  |  |  |  |
| Any Parental Mental Health Problem | 0.482 | 0.236 * | 0.378 | 0.201 + |
|  |  |  |  |  |
| Birthyear | 0.015 | 0.010 | 0.019 | 0.011 |
| Male | -0.429 | 0.192 * | -0.293 | 0.208 |
| White | 0.071 | 0.188 | -0.046 | 0.220 |
|  |  |  |  |  |
| Childhood Mental Health Problem |  |  | 0.492 | 0.236 * |
| Family Received Welfare |  |  | -0.131 | 0.335 |
| Family Well off Financially in Childhooda |  |  | -0.077 | 0.102 |
|  |  |  |  |  |
| BIC | 1327.570 |  | 1624.868 |  |
| *Note. SE=Standard Error; Birth year is mean-centered;*  *aFamily Well off Financially in Childhood indicates how well off R reported R's family was financially compared to the average family during R's childhood (1=a lot better off, 5= a lot worse off);*  *p<.1* + *p<.05 * p<.01 ** p<.001 **** | | | | |
